# Supplementary material
Source: publisher figshare collection journal article supplement (https://acs.figshare.com/ndownloader/files/17421875)
Supplement: Supplementary file 1 [file 17421875]

## Supporting Information

# Realization of tunable localized surface plasmon resonance of Cu@Cu<sub>2</sub>O core-shell nanoparticles by PLD method

Hongbu Yin, <sup>†</sup> Yan Zhao, <sup>\*,†</sup> Xibin Xu, <sup>†</sup> Jie Chen, <sup>†</sup> Xuemin Wang, <sup>†</sup> Jian Yu, <sup>†</sup> Jin

Wang, <sup>†</sup> Weidong Wu <sup>†,‡</sup>

\* Corresponding author. E-mail: [zhaoyan267@163.com](mailto:zhaoyan267@163.com)

<sup>†</sup> Science and Technology on Plasma Physics Laboratory, Research Center of Laser fusion, China Academy of Engineering Physics, Mianyang 621900, Sichuan, People's Republic of China

<sup>‡</sup> Collaborative Innovation Center of IFSA (CICIFSA), Shanghai Jiao Tong University, Shanghai 200240, People's Republic of China

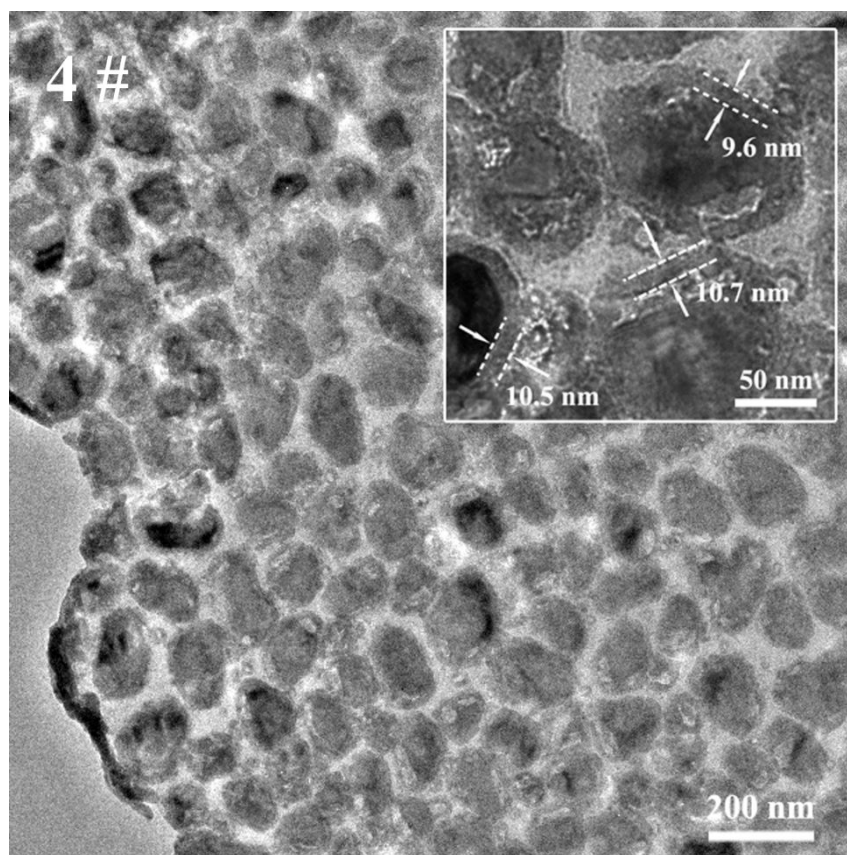

**Figure S1.** TEM images of sample 4#

As shown in Figure S1, the thickness of  $\text{Cu}_2\text{O}$  shell is consistently about 10 nm.

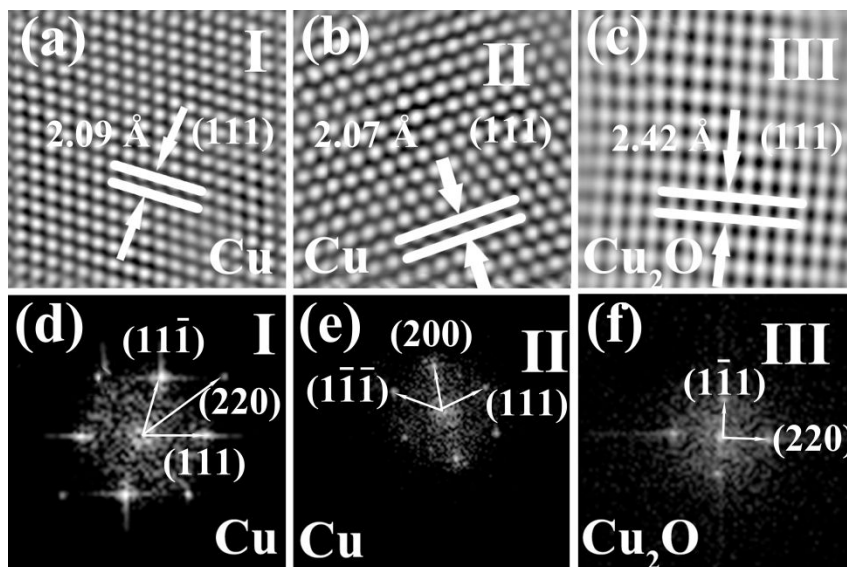

**Figure S2.** TEM images with detail information of region I, II and III in Figure 2. (a)-(c) IFFT images obtained from HRTEM images of region I, II and III in Figure 2; (d)-(f) FFT images obtained from HRTEM images of region I, II and III in Figure 2.

Figure S2 contains information about the crystal structure being calibrated, which is a supplement to Figure 2.

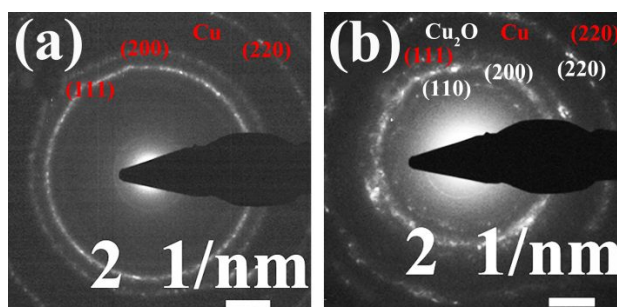

**Figure S3.** SAED images with detail information of (a) sample 1# and (b) sample 3#.

Figure S3 contains information about the crystal structure being calibrated, which is a supplement to Figure 2e, f.

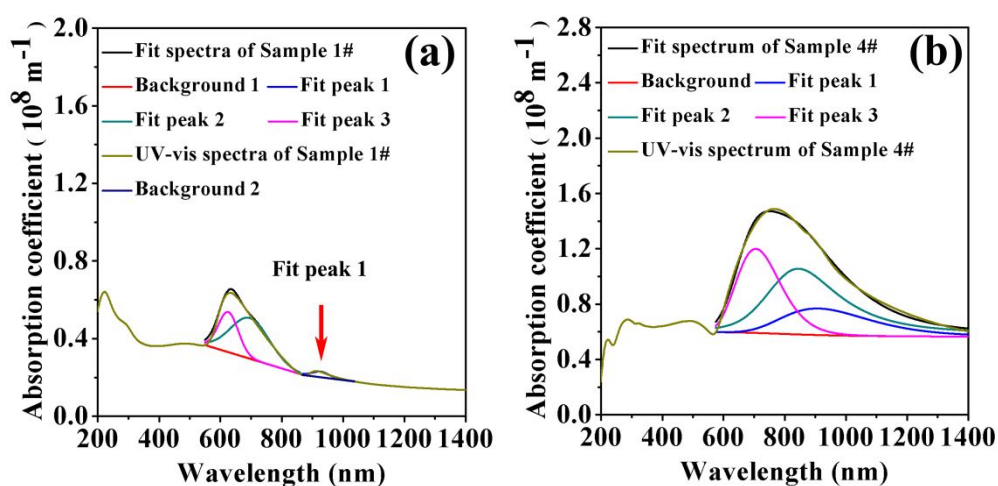

**Figure S4.** UV-vis absorption coefficient spectra of the NPs. (a) UV-vis sub-peaks fitting figure of sample 1#; (b)

UV-vis sub-peaks fitting figure of sample 4#.

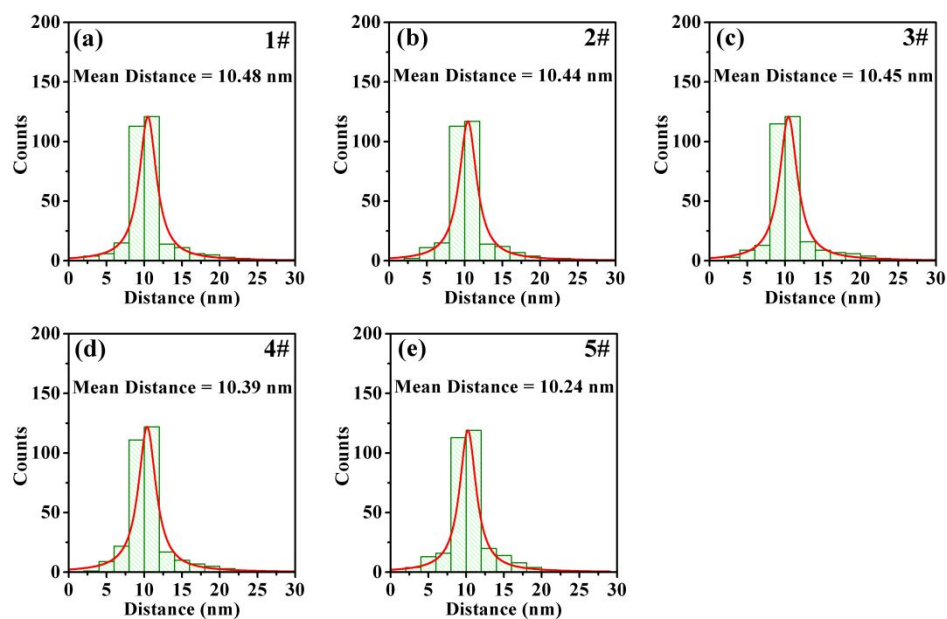

**Figure S5.** (a)-(e) The distribution histogram of distance between the NPs in sample 1-5#, respectively.
